# Supplementary material for: Isotope-Based Early-Warning Model for Monitoring Groundwater–Leachate Contamination Phenomena: First Quantitative Assessments
Source: MDPI journal article supplement (doi:10.3390/w15142646), 2023-07-21
Supplement: s1 [file s1]

## Supplementary Material

Table S1. Trace elements concentrations. Data for monitoring surveys: January, April, July and October

| January |          |          |          |          |          |
|---------|----------|----------|----------|----------|----------|
| Samples | Fe [ppm] | Mn [ppm] | Ni [ppm] | Co [ppm] | Zn [ppm] |
| AD16    | 124.94   | 79.9     | 5.95     | 1.93     | 24.81    |
| AD17    | 17.65    | 24.28    | 2.39     | 0.64     | 6.99     |
| AD47    | 151.53   | 75.9     | 4.51     | 1.67     | 17.34    |
| AD63    | 14.83    | 20.40    | 2.01     | 0.54     | 5.87     |
| AD60    | 16.61    | 22.84    | 2.25     | 0.60     | 6.58     |
| AD32    | 22.21    | 17.80    | 3.98     | 0.87     | 9.43     |
| AD64    | 21.32    | 17.09    | 3.82     | 0.84     | 9.05     |
| AD85    | 29.00    | 23.24    | 5.20     | 1.14     | 12.31    |
| AP      | 26.39    | 21.15    | 4.73     | 1.03     | 11.20    |
| PE1     | 188.10   | 96.68    | 7.20     | 2.34     | 30.02    |
| PE2     | 220.08   | 113.11   | 8.42     | 2.73     | 35.12    |
| P1      | 25.81    | 20.68    | 4.62     | 1.01     | 10.96    |
| P6      | 29.01    | 23.25    | 5.20     | 1.14     | 12.32    |
| PM1     | 26.07    | 20.89    | 4.67     | 1.02     | 11.07    |
| P5      | 18.10    | 24.90    | 2.45     | 0.66     | 7.17     |
| April   |          |          |          |          |          |
| Samples | Fe [ppm] | Mn [ppm] | Ni [ppm] | Co [ppm] | Zn [ppm] |
| AD16    | 153.68   | 98.28    | 7.32     | 2.37     | 30.52    |
| AD13    | 149.07   | 95.33    | 8.50     | 2.45     | 39.60    |
| AD47    | 25.28    | 20.26    | 4.53     | 0.99     | 10.74    |
| AD68    | 284.30   | 181.81   | 13.54    | 4.39     | 56.46    |
| AD73    | 275.77   | 176.36   | 22.34    | 5.54     | 82.81    |
| AP      | 23.75    | 19.03    | 4.26     | 0.93     | 10.08    |
| July    |          |          |          |          |          |
| Samples | Fe [ppm] | Mn [ppm] | Ni [ppm] | Co [ppm] | Zn [ppm] |
| AD13    | 2.22     | 1.78     | 0.40     | 0.09     | 0.94     |
| AD16    | 225.90   | 144.47   | 10.76    | 4.40     | 63.23    |
| P1      | 13.62    | 18.73    | 1.84     | 0.49     | 5.39     |
| P4      | 15.25    | 20.98    | 2.07     | 0.55     | 6.04     |
| P5      | 17.08    | 23.50    | 2.31     | 0.62     | 6.76     |

|     |        |        |       |      |       |
|-----|--------|--------|-------|------|-------|
| P6  | 19.13  | 26.32  | 2.59  | 0.69 | 7.58  |
| P12 | 21.43  | 29.47  | 2.90  | 0.78 | 8.49  |
| PM1 | 24.00  | 33.01  | 3.25  | 0.87 | 9.50  |
| P13 | 26.88  | 36.97  | 3.64  | 0.97 | 10.64 |
| ADF | 30.10  | 41.41  | 4.08  | 1.09 | 11.92 |
| PE1 | 357.39 | 183.69 | 13.68 | 4.44 | 57.04 |
| PE2 | 314.50 | 214.92 | 16.00 | 5.19 | 66.73 |

October

| Samples | Fe [ppm] | Mn [ppm] | Ni [ppm] | Co [ppm] | Zn [ppm] |
|---------|----------|----------|----------|----------|----------|
| AP      | 30.10    | 41.41    | 4.08     | 1.09     | 11.92    |
| AD10    | 33.71    | 46.38    | 4.57     | 1.22     | 13.35    |
| AD16    | 189.02   | 120.88   | 9.00     | 5.30     | 41.43    |
| AD17    | 26.14    | 35.96    | 3.54     | 0.95     | 10.35    |
| AD53    | 36.72    | 50.52    | 4.97     | 1.33     | 14.54    |
| AD68    | 28.30    | 38.92    | 3.83     | 1.03     | 11.21    |
| AD71    | 31.69    | 43.59    | 4.29     | 1.15     | 12.55    |
| AD76    | 36.19    | 49.79    | 4.90     | 1.31     | 14.33    |
| AD55    | 24.57    | 33.80    | 3.33     | 0.89     | 9.73     |
| AD56    | 41.13    | 56.58    | 5.57     | 1.49     | 16.29    |
| AD58    | 21.43    | 29.47    | 2.90     | 0.78     | 8.49     |
| AD59    | 24.00    | 33.01    | 3.25     | 0.87     | 9.50     |
| AD73    | 39.90    | 54.88    | 5.40     | 1.45     | 15.80    |
| AD13    | 35.11    | 48.30    | 4.75     | 1.27     | 13.90    |
| ADF     | 30.90    | 42.50    | 4.18     | 1.12     | 12.24    |
| P1      | 27.19    | 37.40    | 3.68     | 0.99     | 10.77    |
| P4      | 23.93    | 32.91    | 3.24     | 0.87     | 9.48     |
| P5      | 21.05    | 28.96    | 2.85     | 0.76     | 12.12    |
| P6      | 18.53    | 25.49    | 2.51     | 0.67     | 10.67    |
| PM1     | 16.30    | 22.43    | 2.21     | 0.59     | 9.39     |
| P12     | 18.26    | 25.12    | 2.47     | 0.66     | 10.51    |
| P13     | 20.45    | 28.14    | 2.77     | 0.74     | 11.77    |
| PE1     | 142.96   | 73.48    | 5.47     | 1.77     | 22.82    |
| PE2     | 167.26   | 85.97    | 6.40     | 2.08     | 26.69    |
